# Supplementary material
Source: publisher figshare collection journal article supplement (https://frontiersin.figshare.com/ndownloader/files/22149957)
Supplement: Supplementary file 1 [file 22149957]

**Supplementary Table 1.** Statistical summary of measured environmental variables. A constant metabolic rate of 1.1 met was assumed for all occupants

| Space | Season | Samples | Daily mean outdoor temp. (°C) | | Air temp.  (°C) | | MRT  (°C) | | Air velocity  (m/s) | | Relative humidity  (%) | | Clothing  insulation  (clo) | | SET*  (°C) | |
| --- | --- | --- | --- | --- | --- | --- | --- | --- | --- | --- | --- | --- | --- | --- | --- | --- |
|  |  |  | AVE | S.D. | AVE | S.D. | AVE | S.D. | AVE | S.D. | AVE | S.D. | AVE | S.D. | AVE | S.D. |
| O | Spring | 117 | 16.0 | 2.2 | 18.7 | 3.1 | 19.5 | 5.1 | 0.88 | 0.47 | 61 | 9 | 0.91 | 0.20 | 19.0 | 3.7 |
|  | Summer | 297 | 27.5 | 1.5 | 29.5 | 2.5 | 30.3 | 3.1 | 1.06 | 0.59 | 65 | 13 | 0.51 | 0.17 | 27.1 | 3.1 |
|  | Autumn | 141 | 17.2 | 2.4 | 19.7 | 3.3 | 20.6 | 3.7 | 0.81 | 0.34 | 52 | 17 | 0.87 | 0.23 | 19.7 | 3.0 |
|  | Winter | 49 | 9.0 | 1.5 | 10.7 | 1.8 | 10.9 | 6.1 | 1.05 | 0.54 | 51 | 29 | 1.23 | 0.29 | 13.7 | 3.1 |
|  |  |  |  |  |  |  |  |  |  |  |  |  |  |  |  |  |
| T | Spring | 143 | 15.2 | 1.6 | 18.2 | 2.9 | 23.7 | 10.8 | 0.98 | 0.41 | 51 | 9 | 0.85 | 0.22 | 19.1 | 5.0 |
|  | Summer | 238 | 24.7 | 2.3 | 27.5 | 2.9 | 32.5 | 7.2 | 0.84 | 0.48 | 57 | 9 | 0.50 | 0.15 | 26.2 | 4.0 |
|  | Autumn | 187 | 14.0 | 2.0 | 17.4 | 2.4 | 22.2 | 9.1 | 0.66 | 0.24 | 45 | 9 | 0.95 | 0.26 | 19.7 | 4.4 |
|  | Winter | 125 | 6.4 | 0.7 | 9.3 | 1.3 | 16.6 | 14.5 | 0.78 | 0.34 | 32 | 10 | 1.28 | 0.25 | 15.6 | 5.7 |
|  |  |  |  |  |  |  |  |  |  |  |  |  |  |  |  |  |
| P | Spring | 136 | 18.6 | 2.5 | 23.1 | 0.9 | 23.2 | 1.0 | 0.19 | 0.07 | 43 | 6 | 0.75 | 0.22 | 24.0 | 1.9 |
|  | Summer | 289 | 23.1 | 2.2 | 26.0 | 1.6 | 26.6 | 1.7 | 0.21 | 0.12 | 65 | 6 | 0.63 | 0.20 | 26.9 | 2.0 |
|  | Autumn | 158 | 18.3 | 1.5 | 24.4 | 1.4 | 24.6 | 1.4 | 0.26 | 0.13 | 46 | 5 | 0.77 | 0.22 | 25.2 | 2.1 |
|  | Winter | 115 | 9.0 | 2.1 | 19.8 | 1.7 | 19.1 | 1.6 | 0.30 | 0.19 | 41 | 7 | 1.17 | 0.37 | 23.0 | 2.7 |
|  |  |  |  |  |  |  |  |  |  |  |  |  |  |  |  |  |
| B | Spring | 118 | 15.7 | 2.1 | 20.8 | 1.7 | 20.8 | 1.6 | 0.22 | 0.07 | 56 | 4 | 0.82 | 0.21 | 22.2 | 2.1 |
|  | Summer | 327 | 26.9 | 2.1 | 25.2 | 0.9 | 26.2 | 0.9 | 0.29 | 0.08 | 64 | 4 | 0.54 | 0.17 | 24.8 | 1.7 |
|  | Autumn | 149 | 12.2 | 0.7 | 20.3 | 1.0 | 20.5 | 1.1 | 0.24 | 0.08 | 36 | 9 | 1.02 | 0.25 | 23.0 | 2.2 |
|  | Winter | 122 | 8.6 | 1.8 | 19.0 | 1.1 | 18.5 | 1.2 | 0.29 | 0.12 | 32 | 13 | 1.27 | 0.31 | 22.9 | 2.5 |
